# Supplementary material for: Preparation, characterization and biochemical studies of nanoformulations of chlorambucil to enhance anticancer efficacy
Source: Royal Society of Chemistry journal article supplement (doi:10.1039/d3nj03760f), 2023-01-01
Supplement: d3nj03760f1.pdf [file d3nj03760f1.pdf]

### Supplementary figures

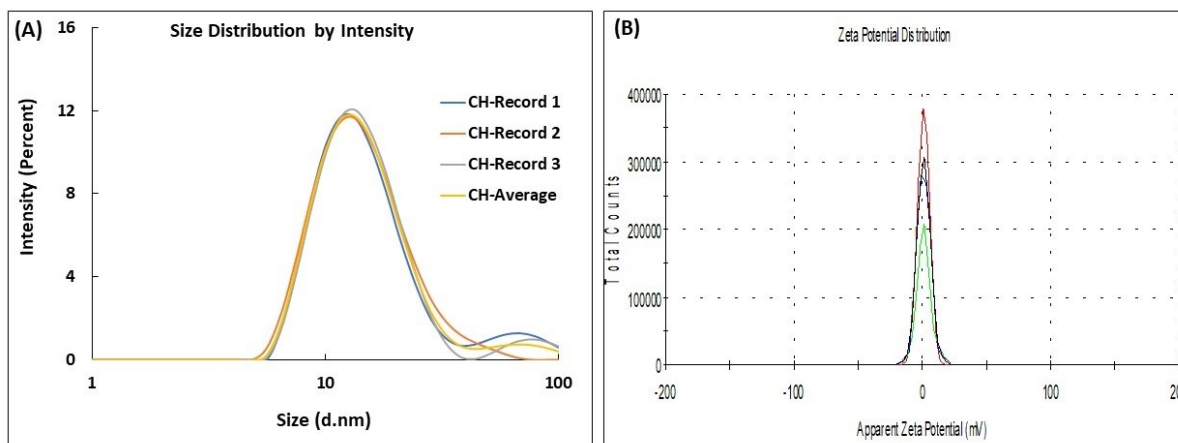

**Figure S1.** (A) Size and (B) zeta potential of nCH.

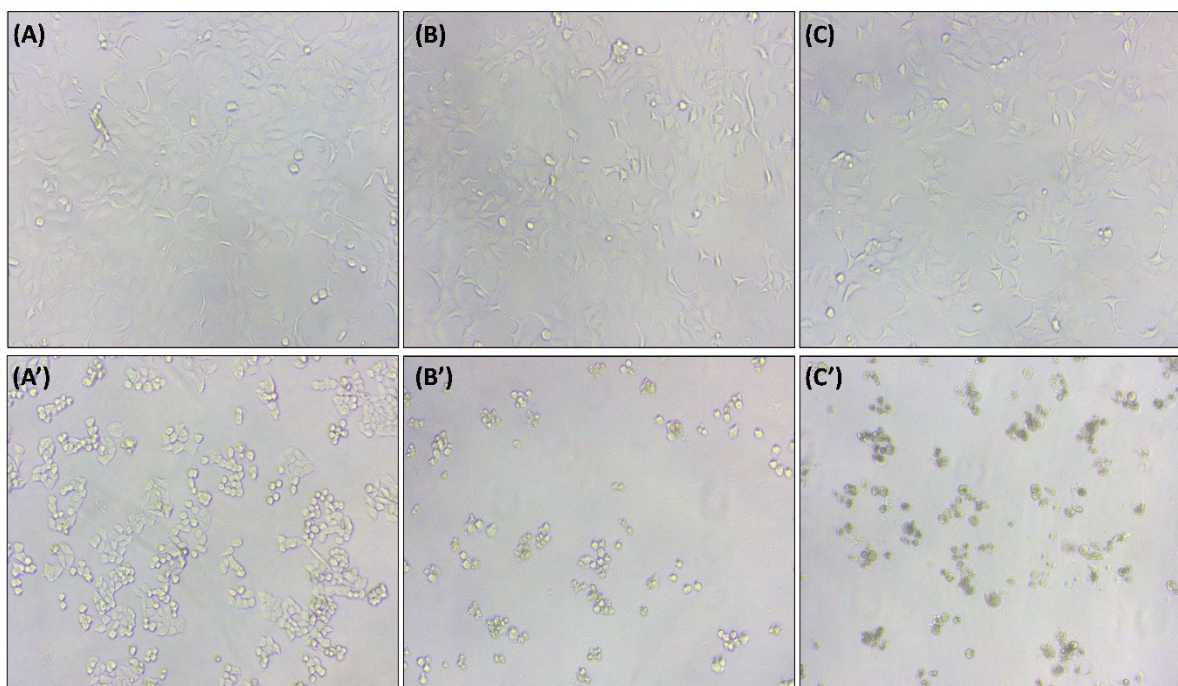

**Figure S2.** Morphological changes in HEK-293 (A-C) and HCT-116 (A'-C') cells after the treatment with pure CH (B and B') and nCH (C and C') as compared to control (A and A'). Images were captured by an inverted phase microscope at 10X magnification.
